# Supplementary material for: Energetic and topological supramolecular study and nucleation proposal for halogenated aryl amides
Source: Royal Society of Chemistry journal article supplement (doi:10.1039/d2ce00049k), 2022-01-01

## Electronic Supporting information file for

# Energetic and Topological Supramolecular Study and Nucleation Proposal of Halogenated Aryl Amides

Patrick Teixeira Campos\*<sup>a</sup>, Gabriel Machado Rodrigues<sup>a</sup>, Luiza Pereira Afonso<sup>a</sup>, Vanessa Uecker Krüger<sup>a</sup>,  
Rubia Mara Siqueira da Silva<sup>a</sup>, Marcéo Auler Milani<sup>b</sup>

|                                                                                                             |   |
|-------------------------------------------------------------------------------------------------------------|---|
| <b>Table S1.</b> Energy and contact surface of the interactions on compound 1A supramolecular cluster.....  | 3 |
| <b>Table S2.</b> Energy and contact surface of the interactions on compound 1B supramolecular cluster.....  | 3 |
| <b>Table S3.</b> Energy and contact surface of the interactions on compound 2 supramolecular cluster.....   | 4 |
| <b>Table S4.</b> Energy and contact surface of the interactions on compound 3 supramolecular cluster.....   | 4 |
| <b>Table S5.</b> Energy and contact surface of the interactions on compound 4 supramolecular cluster.....   | 5 |
| <b>Table S6.</b> Energy and contact surface of the interactions on compound 5 supramolecular cluster.....   | 5 |
| <b>Table S7.</b> Energy and contact surface of the interactions on compound 6 supramolecular cluster.....   | 6 |
| <b>Table S8.</b> Energy and contact surface of the interactions on compound 7 supramolecular cluster.....   | 6 |
| <b>Table S9.</b> Energy and contact surface of the interactions on compound 8 supramolecular cluster.....   | 7 |
| <b>Table S10.</b> Energy and contact surface of the interactions on compound 9 supramolecular cluster.....  | 7 |
| <b>Table S11.</b> Energy and contact surface of the interactions on compound 11 supramolecular cluster..... | 8 |
| <b>Table S12.</b> Energy and contact surface of the interactions on compound 12 supramolecular cluster..... | 8 |

|                                                                                                                 |    |
|-----------------------------------------------------------------------------------------------------------------|----|
| <b>Figure S1.</b> Central molecule with neighboring molecules in the same plane for compound 1A..               | 9  |
| <b>Figure S2.</b> Central Molecule with neighboring molecules in upper and lower planes for compound 1A. ....   | 9  |
| <b>Figure S3.</b> Central molecule with neighboring molecules in the same plane for compound 1B.10              |    |
| <b>Figure S4.</b> Central Molecule with neighboring molecules in upper and lower planes for compound 1B. ....   | 10 |
| <b>Figure S5.</b> Central molecule with neighboring molecules in the same plane for compound 2..                | 11 |
| <b>Figure S6.</b> Central Molecule with neighboring molecules in upper and lower planes for compound 2. ....    | 11 |
| <b>Figure S7.</b> Central molecule with neighboring molecules in the same plane for compound 3..                | 12 |
| <b>Figure S8.</b> Central Molecule with neighboring molecules in upper and lower planes for compound 3. ....    | 12 |
| <b>Figure S9.</b> Central molecule with neighboring molecules in the same plane for compound 4..                | 13 |
| <b>Figure S10.</b> Central Molecule with neighboring molecules in upper and lower planes for compound 4. ....   | 13 |
| <b>Figure S11.</b> Central molecule with neighboring molecules in the same plane for compound 5.14              |    |
| <b>Figure S12.</b> Central Molecule with neighboring molecules in upper and lower planes for compound 5. ....   | 14 |
| <b>Figure S13.</b> Central molecule with neighboring molecules in the same plane for compound 6.15              |    |
| <b>Figure S14.</b> Central Molecule with neighboring molecules in upper and lower planes for compound 6. ....   | 15 |
| <b>Figure S15.</b> Central molecule with neighboring molecules in the same plane for compound 7.16              |    |
| <b>Figure S16.</b> Central Molecule with neighboring molecules in upper and lower planes for compound 7. ....   | 16 |
| <b>Figure S17.</b> Central molecule with neighboring molecules in the same plane for compound 8.17              |    |
| <b>Figure S18.</b> Central Molecule with neighboring molecules in upper and lower planes for compound 8. ....   | 17 |
| <b>Figure S19.</b> Central molecule with neighboring molecules in the same plane for compound 9.18              |    |
| <b>Figure S20.</b> Central Molecule with neighboring molecules in upper and lower planes for compound 9. ....   | 18 |
| <b>Figure S21.</b> Central molecule with neighboring molecules in the same plane for compound 11. ....          | 19 |
| <b>Figure S22.</b> Central Molecule with neighboring molecules in upper and lower planes for compound 11. ....  | 19 |
| <b>Figure S23.</b> Central molecule with neighboring molecules in the same plane for compound 12 ....           | 20 |
| <b>Figure S24.</b> Central Molecule with neighboring molecules in upper and lower planes for compound 12 ....   | 20 |
| <b>Figure S25</b> - energy range by interaction Class.....                                                      | 21 |
| <b>Figure S26</b> - Area range by interaction class.....                                                        | 21 |
| <b>Figure S27</b> - Nucleation proposal for compound 6. ....                                                    | 22 |
| <b>Figure S28</b> – last stage of the nucleation for compound 1 (a), 2 – 3 (b), 6 – 9(C) and 5, 10 - 12(d) .... | 22 |

| Dimer    | Interaction                       | GM1...Mn | GcM1...Mn | CM1...Mn | NG   | NC   | Type |
|----------|-----------------------------------|----------|-----------|----------|------|------|------|
| m1...m2  | N2-H2A...O1<br>N1-H1A...O2        | -15,09   | -14,56    | 13,43    | 4,25 | 0,97 | I    |
| m1...m3  | F2...H26-C26                      | -0,18    | -0,07     | 2,74     | 0,02 | 0,20 | III  |
| m1...m4  | F2...H16-C16                      | -1,63    | -1,36     | 15,69    | 0,40 | 1,14 | IV   |
| m1...m5  | C24-H24...F1                      | -1,53    | -1,25     | 11,63    | 0,37 | 0,84 | III  |
| m1...m6  | C26-H26-F2                        | -0,18    | -0,07     | 2,74     | 0,02 | 0,20 | III  |
| m1...m7  | C27-H27... $\pi$ 1                | -3,04    | -2,60     | 20,89    | 0,76 | 1,52 | IV   |
| m1...m8  | O2...H26-C26                      | -1,99    | -1,70     | 15       | 0,50 | 1,09 | IV   |
| m1...m9  | $\pi$ 2...H15-C15                 | -2,74    | -2,54     | 14,3     | 0,74 | 1,04 | III  |
| m1...m10 | C24-H24...O1                      | -3,22    | -3,00     | 8,62     | 0,87 | 0,63 | III  |
| m1...m11 | O2...H2B-N2<br>$\pi$ 2... $\pi$ 2 | -8,73    | -8,28     | 23,41    | 2,42 | 1,70 | II   |
| m1...m12 | N1-H1B...H1A-N1                   | 0,82     | 0,98      | 4,57     | 0,29 | 0,33 | III  |
| m1...m13 | N2-H2B...O2<br>$\pi$ 2... $\pi$ 2 | -8,73    | -8,28     | 23,41    | 2,42 | 1,70 | II   |
| m1...m14 | C26-H26...O2                      | -1,99    | -1,70     | 15       | 0,50 | 1,09 | IV   |
| m1...m15 | C16-H16... $\pi$ 2                | -3,90    | -3,53     | 21,48    | 1,03 | 1,56 | II   |

**Table S1.** Energy and contact surface of the interactions on compound 1A supramolecular cluster.

| Dimer    | Interaction                       | GM1...Mn | GcM1...Mn | CM1...Mn | NG   | NC   | Type |
|----------|-----------------------------------|----------|-----------|----------|------|------|------|
| m1...m2  | N1-H1A...O2<br>O1...H2A-N2        | -15,09   | -14,56    | 13,43    | 3,67 | 0,91 | I    |
| m1...m3  | F1...H24-C24                      | -1,60    | -1,25     | 11,63    | 0,32 | 0,78 | III  |
| m1...m4  | F1...H14-C14<br>C14-H14...F1      | -2,20    | -1,78     | 13,89    | 0,45 | 0,94 | III  |
| m1...m5  | C15-H15... $\pi$ 2                | -2,81    | -2,54     | 14,3     | 0,64 | 0,97 | III  |
| m1...m6  | C16-H16...F2                      | -1,71    | -1,35     | 15,69    | 0,34 | 1,06 | IV   |
| m1...m7  | C16-H16... $\pi$ 2                | -3,90    | -3,53     | 21,84    | 0,89 | 1,47 | IV   |
| m1...m8  | O1...H25-C25                      | -3,29    | -3,00     | 8,62     | 0,76 | 0,58 | III  |
| m1...m9  | $\pi$ 1... $\pi$ 2                | -4,73    | -4,20     | 16,99    | 1,06 | 1,15 | II   |
| m1...m10 | O1...H2B-N2<br>$\pi$ 1... $\pi$ 2 | -8,10    | -7,47     | 22,31    | 1,88 | 1,51 | II   |
| m1...m11 | N1-H1B...H1A-N1                   | 0,82     | 0,98      | 4,57     | 0,25 | 0,31 | III  |
| m1...m12 | N1-H1B...O1<br>$\pi$ 1... $\pi$ 1 | -8,10    | -7,47     | 22,31    | 1,88 | 1,51 | II   |
| m1...m13 | $\pi$ 1...H27-C27                 | -3,04    | -2,60     | 20,89    | 0,66 | 1,41 | IV   |
| m1...m14 | O1...H1A-N1<br>N1-H1A...O1        | -3,14    | -2,75     | 6,13     | 0,69 | 0,41 | III  |

**Table S2.** Energy and contact surface of the interactions on compound 1B supramolecular cluster.

| Dimer    | Interaction                | GM1...Mn | GcM1...Mn | CM1...Mn | NG   | NC   | Type |
|----------|----------------------------|----------|-----------|----------|------|------|------|
| m1...m2  | O1...H1A-N1<br>N1-H1A...O1 | -13,29   | -12,72    | 12,38    | 3,21 | 0,85 | I    |
| m1...m3  | C7-H7...π                  | -4,85    | -3,97     | 19,64    | 1,00 | 1,35 | II   |
| m1...m4  | C6-H6...H6-C6              | -0,78    | -0,16     | 14,01    | 0,04 | 0,96 | IV   |
| m1...m5  | C5-H5...O1                 | -3,34    | -2,86     | 11,61    | 0,72 | 0,80 | III  |
| m1...m6  | C4-H4...O1                 | -4,90    | -4,20     | 14,9     | 1,06 | 1,02 | II   |
| m1...m7  | O1...H5-C5                 | -3,71    | -2,85     | 11,61    | 0,72 | 0,80 | III  |
| m1...m8  | O1...H4-C4                 | -4,83    | -4,20     | 14,9     | 1,06 | 1,02 | II   |
| m1...m9  | Others                     | -2,02    | -1,54     | 7,68     | 0,39 | 0,53 | III  |
| m1...m10 | C4-H4...H1A-N1             | -0,55    | 0,16      | 8,73     | 0,04 | 0,60 | IV   |
| m1...m11 | O1...H1B-N1<br>π...π       | -11,12   | -10,06    | 28,58    | 2,54 | 1,97 | II   |
| m1...m12 | N1-H1A...H1B-N1            | 0,49     | 0,82      | 2,57     | 0,21 | 0,18 | III  |
| m1...m13 | N1-H1B...O1<br>π...π       | -10,91   | -10,06    | 28,58    | 2,54 | 1,97 | II   |
| m1...m14 | π...H7-C7                  | -4,93    | -3,96     | 19,64    | 1,00 | 1,35 | II   |
| m1...m15 | C4-H4...H1A-N1             | -0,30    | 0,16      | 8,73     | 0,04 | 0,60 | IV   |

**Table S3.** Energy and contact surface of the interactions on compound 2 supramolecular cluster.

| Dimer    | Interaction                | GM1...Mn | GcM1...Mn | CM1...Mn | NG   | NC   | Type |
|----------|----------------------------|----------|-----------|----------|------|------|------|
| m1...m2  | O1...H1A-N1<br>N1-H1A...O1 | -12,36   | -12,12    | 11,95    | 2,93 | 0,82 | I    |
| m1...m3  | C7-H7...H5-C5              | -0,22    | -0,32     | 12,7     | 0,08 | 0,88 | IV   |
| m1...m4  | C6-H6...N1                 | -4,23    | -4,21     | 18,11    | 1,02 | 1,25 | II   |
| m1...m5  | C5-H5...O1                 | -2,35    | -2,40     | 8,94     | 0,58 | 0,62 | III  |
| m1...m6  | C4-H4...Br1<br>Br1...H4-C4 | -2,33    | -2,32     | 11,49    | 0,56 | 0,79 | III  |
| m1...m7  | Br1...π                    | -2,69    | -2,67     | 8,84     | 0,64 | 0,61 | III  |
| m1...m8  | O1...H5-C5                 | -2,47    | -2,40     | 8,94     | 0,58 | 0,62 | III  |
| m1...m9  | π...Br1                    | -2,72    | -2,67     | 8,84     | 0,64 | 0,61 | III  |
| m1...m10 | Others                     | -0,02    | -0,32     | 12,7     | 0,08 | 0,88 | IV   |
| m1...m11 | O1...H1B-N<br>π...π        | -10,61   | -10,41    | 27,91    | 2,51 | 1,92 | II   |
| m1...m12 | N1-H1A...H1B-N1            | 0,98     | 0,86      | 5,3      | 0,21 | 0,37 | III  |
| m1...m13 | N-H1B...O1<br>π...π        | -10,64   | -10,41    | 27,91    | 2,51 | 1,92 | II   |
| m1...m14 | Br1...H5-C5<br>C5-H5...Br1 | -4,37    | -4,40     | 21,37    | 1,06 | 1,47 | II   |
| m1...m15 | O1...H6-C6                 | -4,20    | -4,21     | 18,11    | 1,02 | 1,25 | II   |

**Table S4.** Energy and contact surface of the interactions on compound 3 supramolecular cluster

| Dimer    | Interaction                   | GM1...Mn | GcM1...Mn | CM1...Mn | NG   | NC   | Type |
|----------|-------------------------------|----------|-----------|----------|------|------|------|
| m1...m2  | O1...H1A-N<br>N-H1A...O1      | -13.19   | -12.68    | 12.23    | 2.95 | 0.82 | I    |
| m1...m3  | N-H1B...H5-C5                 | -0.64    | -0.33     | 13.12    | 0.08 | 0.88 | IV   |
| m1...m4  | C6-H6...O1                    | -4.61    | -4.21     | 18.65    | 0.98 | 1.25 | III  |
| m1...m5  | C5-H5...O1                    | -3.02    | -2.38     | 9.31     | 0.56 | 0.62 | III  |
| m1...m6  | C4-H4...I1<br>I1...H4-C4      | -2.24    | -2.26     | 11.13    | 0.53 | 0.75 | III  |
| m1...m7  | I1... $\pi$                   | -3.28    | -2.89     | 8.95     | 0.67 | 0.60 | III  |
| m1...m8  | O1...H5-C5                    | -2.76    | -2.39     | 9.31     | 0.56 | 0.62 | III  |
| m1...m9  | $\pi$ ...I1                   | -3.31    | -2.89     | 8.95     | 0.67 | 0.60 | III  |
| m1...m10 | C5-H5...H1B-N1                | -0.90    | -0.33     | 13.12    | 0.08 | 0.88 | IV   |
| m1...m11 | O1...H1B-N<br>$\pi$ ... $\pi$ | -11.76   | -11.18    | 29.25    | 2.60 | 1.96 | II   |
| m1...m12 | N1-H1A...H1B-N1               | 0.91     | 1.09      | 5.53     | 0.25 | 0.37 | III  |
| m1...m13 | N-H1B...O1<br>$\pi$ ... $\pi$ | -11.76   | -11.18    | 29.25    | 2.60 | 1.96 | II   |
| m1...m14 | C5-H5...I1<br>I1...H5-C5      | -4.17    | -4.28     | 21.39    | 1.00 | 1.43 | III  |
| m1...m15 | O1...H6-C6                    | -4.58    | -4.21     | 18.65    | 0.98 | 1.25 | III  |

**Table S5.** Energy and contact surface of the interactions on compound 4 supramolecular cluster.

| Dimer    | Interaction                        | GM1...Mn | GcM1...Mn | CM1...Mn | NG   | NC   | Type |
|----------|------------------------------------|----------|-----------|----------|------|------|------|
| m1...m2  | O1...H1A-N<br>N-H1A...O1           | -19,66   | -19,20    | 15,02    | 4,77 | 1,11 | II   |
| m1...m3  | N-H1B...H7-C7<br>C7-H7...H1B-N     | -1,91    | -1,71     | 12,42    | 0,43 | 0,92 | III  |
| m1...m4  | C6-H6...H3-C3                      | -1,73    | -1,55     | 7,74     | 0,38 | 0,57 | III  |
| m1...m5  | C5-H5... $\pi$                     | -2,34    | -2,12     | 12,24    | 0,53 | 0,91 | III  |
| m1...m6  | F1...H5-C5                         | -1,34    | -0,99     | 12,6     | 0,25 | 0,93 | IV   |
| m1...m7  | C3-H3...H6-C6                      | -1,73    | -1,55     | 7,74     | 0,38 | 0,57 | III  |
| m1...m8  | O1...H1A-N<br>N-H1A...O1           | -6,75    | -6,31     | 13,86    | 1,57 | 1,03 | II   |
| m1...m9  | Others                             | -1,95    | -1,62     | 16,98    | 0,40 | 1,26 | IV   |
| m1...m10 | C5-H5...F1                         | -1,34    | -0,99     | 12,6     | 0,25 | 0,93 | IV   |
| m1...m11 | O1...H1B-N<br>$\pi$ ... $\pi$      | -10,33   | -9,84     | 22,14    | 2,44 | 1,64 | II   |
| m1...m12 | N1-H1A...H1B-N1<br>N1-H1B...H1A-N1 | 2,96     | 3,04      | 4,05     | 0,75 | 0,30 | III  |
| m1...m13 | N-H1B...O1<br>$\pi$ ... $\pi$      | -10,33   | -9,84     | 22,14    | 2,44 | 1,64 | II   |
| m1...m14 | $\pi$ ...H5-C5                     | -2,34    | -2,12     | 12,24    | 0,53 | 0,91 | III  |
| m1...m15 | Others                             | -1,95    | -1,62     | 16,98    | 0,40 | 1,26 | IV   |

**Table S6.** Energy and contact surface of the interactions on compound 5 supramolecular cluster.

| Dimer    | Interaction     | GM1...Mn | GcM1...Mn | CM1...Mn | NG   | NC   | Type |
|----------|-----------------|----------|-----------|----------|------|------|------|
| m1...m2  | O1...H1A-N      | -17,14   | -16,80    | 15,81    | 4,08 | 1,07 | II   |
|          | N-H1A...O1      |          |           |          |      |      |      |
| m1...m3  | N-H1B...H1A-N   | 0,71     | 0,69      | 6,45     | 0,17 | 0,44 | III  |
| m1...m4  | C6-H6... $\pi$  | -3,07    | -3,01     | 17,22    | 0,73 | 1,17 | III  |
| m1...m5  | C5-H5...H5-C5   | -0,38    | -0,45     | 3,19     | 0,11 | 0,22 | III  |
| m1...m6  | Cl1...Cl1       | -0,58    | -0,62     | 2,63     | 0,15 | 0,18 | III  |
|          | C3-H3... $\pi$  |          |           |          |      |      |      |
| m1...m7  | O1...H1B-N      | -10,67   | -10,35    | 24,19    | 2,51 | 1,64 | II   |
|          | O1...H1A-N      |          |           |          |      |      |      |
| m1...m8  | N-H1A...O1      | -4,91    | -4,73     | 10,97    | 1,15 | 0,74 | I    |
|          | $\pi$ ... $\pi$ |          |           |          |      |      |      |
| m1...m9  | $\pi$ ... $\pi$ | -3,58    | -3,31     | 28,26    | 0,80 | 1,91 | IV   |
| m1...m10 | Cl1...Cl1       | -0,58    | -0,62     | 5,92     | 0,15 | 0,40 | III  |
| m1...m11 | $\pi$ ...H6-C6  | -3,07    | -3,01     | 17,22    | 0,73 | 1,17 | III  |
| m1...m12 | N-H1B...H1A-N   | 0,71     | 0,69      | 6,45     | 0,17 | 0,44 | III  |
|          | $\pi$ ...H3-C3  |          |           |          |      |      |      |
| m1...m13 | N-H1B...O1      | -10,67   | -10,35    | 24,19    | 2,51 | 1,64 | II   |
|          | Cl1...H5-C5     |          |           |          |      |      |      |
| m1...m14 | C5-H5...Cl1     | -2,57    | -2,48     | 16,1     | 0,60 | 1,09 | III  |
|          | $\pi$ ... $\pi$ |          |           |          |      |      |      |
| m1...m15 | $\pi$ ... $\pi$ | -3,58    | -3,31     | 28,26    | 0,80 | 1,91 | IV   |

**Table S7.** Energy and contact surface of the interactions on compound 6 supramolecular cluster.

| Dimer    | Interaction     | GM1...Mn | GcM1...Mn | CM1...Mn | NG   | NC   | Type |
|----------|-----------------|----------|-----------|----------|------|------|------|
| m1...m2  | O1...H1A-N1     | -13.02   | -12.64    | 15.74    | 3.28 | 1.05 | II   |
|          | N1-H1A...O1     |          |           |          |      |      |      |
| m1...m3  | N1-H1B...H1A-N1 | 0.45     | 0.56      | 5.89     | 0.15 | 0.39 | III  |
| m1...m4  | C6-H6... $\pi$  | -3.00    | -3.30     | 17.37    | 0.85 | 1.16 | III  |
|          | C5-H5...Br1     |          |           |          |      |      |      |
| m1...m5  | Br1...H5-C5     | -2.12    | -2.41     | 15.63    | 0.62 | 1.05 | III  |
|          | Br1...Br1       |          |           |          |      |      |      |
| m1...m6  | Br1...Br1       | -0.46    | -0.84     | 5.68     | 0.22 | 0.38 | III  |
|          | O1...H1B-N1     |          |           |          |      |      |      |
| m1...m7  | C3-H3... $\pi$  | -9.51    | -9.56     | 24.25    | 2.48 | 1.62 | II   |
|          | O1...H1A-N1     |          |           |          |      |      |      |
| m1...m8  | N1-H1A...O1     | -5.00    | -4.74     | 10.11    | 1.23 | 0.68 | I    |
|          | $\pi$ ... $\pi$ |          |           |          |      |      |      |
| m1...m9  | $\pi$ ... $\pi$ | -3.82    | -3.72     | 29.74    | 0.96 | 1.99 | IV   |
| m1...m10 | C5-H5...H5-C5   | -0.31    | -0.54     | 1.84     | 0.14 | 0.12 | III  |
| m1...m11 | Br1...Br1       | -0.46    | -0.84     | 5.68     | 0.22 | 0.38 | III  |
| m1...m12 | $\pi$ ...H5-C5  | -3.00    | -3.30     | 17.37    | 0.85 | 1.16 | III  |
| m1...m13 | N1-H1A...H1B-N1 | 0.45     | 0.56      | 5.89     | 0.15 | 0.39 | III  |
|          | $\pi$ ...H3-C3  |          |           |          |      |      |      |
| m1...m14 | N-H1B...O1      | -9.51    | -9.56     | 24.25    | 2.48 | 1.62 | II   |
|          | $\pi$ ... $\pi$ |          |           |          |      |      |      |
| m1...m15 | $\pi$ ... $\pi$ | -3.82    | -3.72     | 29.74    | 0.96 | 1.99 | IV   |

**Table S8.** Energy and contact surface of the interactions on compound 7 supramolecular cluster.

| Dimer    | Interaction                | GM1...Mn | GcM1...Mn | CM1...Mn | NG   | NC   | Type |
|----------|----------------------------|----------|-----------|----------|------|------|------|
| m1...m2  | O1...H1A-N1<br>N1-H1A...O1 | -17,09   | -16,73    | 15,4     | 3,62 | 0,90 | I    |
| m1...m3  | N1-H1B...H1A-N1            | 0,58     | 0,66      | 6,76     | 0,14 | 0,40 | III  |
| m1...m4  | C6-H6...π                  | -3,49    | -3,38     | 19,24    | 0,73 | 1,13 | III  |
| m1...m5  | C5-H5...I1<br>I1...H5-C5   | -2,34    | -2,35     | 16,65    | 0,51 | 0,98 | III  |
| m1...m6  | I1...I1                    | -1,40    | -1,37     | 6,05     | 0,30 | 0,35 | III  |
| m1...m7  | C3-H3...π<br>O1...H1B-N1   | -11,72   | -11,40    | 26,28    | 2,46 | 1,54 | II   |
| m1...m8  | O1...H1B-N1<br>N-H1B...O1  | -4,91    | -4,73     | 11,39    | 1,02 | 0,67 | I    |
| m1...m9  | π...π                      | -4,11    | -3,83     | 30,99    | 0,83 | 1,82 | IV   |
| m1...m10 | I1...I1                    | -1,40    | -1,37     | 6,05     | 0,30 | 0,35 | III  |
| m1...m11 | π...H6-C6                  | -3,49    | -3,38     | 19,24    | 0,73 | 1,13 | III  |
| m1...m12 | N1-H1B...H1A-N1            | 0,58     | 0,66      | 6,76     | 0,14 | 0,40 | III  |
| m1...m13 | π...H3-C3<br>N-H1B...O1    | -11,74   | -11,39    | 26,28    | 2,46 | 1,54 | II   |
| m1...m14 | I1...H5-C5<br>C5-H5...I1   | -2,34    | -2,35     | 16,65    | 0,51 | 0,98 | III  |
| m1...m15 | π...π                      | -4,11    | -3,83     | 30,99    | 0,83 | 1,82 | IV   |

**Table S9.** Energy and contact surface of the interactions on compound 8 supramolecular cluster.

| Dimer    | Interaction                | GM1...Mn | GcM1...Mn | CM1...Mn | NG   | NC   | Type |
|----------|----------------------------|----------|-----------|----------|------|------|------|
| m1...m2  | O1...H1A-N1<br>N1-H1A...O1 | -16.97   | -16.56    | 13.75    | 4.90 | 1.16 | II   |
| m1...m3  | N1-H1A...H3-C3             | 0.43     | 0.52      | 8.50     | 0.15 | 0.72 | IV   |
| m1...m4  | C4-H4...π                  | -2.18    | -1.95     | 12.59    | 0.58 | 1.06 | III  |
| m1...m5  | F1...F1                    | -0.02    | 0.20      | 5.42     | 0.06 | 0.46 | III  |
| m1...m6  | F1...H6-C6                 | -1.89    | -1.66     | 16.19    | 0.49 | 1.37 | IV   |
| m1...m7  | O1...H1B-N1                | -10.12   | -9.74     | 15.03    | 2.88 | 1.27 | II   |
| m1...m8  | O1...H4-C4<br>C4-H4...O1   | -9.05    | -8.59     | 25.76    | 2.54 | 2.18 | II   |
| m1...m9  | C7-H7...H1A-N1             | 0.43     | 0.52      | 8.50     | 0.15 | 0.72 | IV   |
| m1...m10 | Others                     | -0.66    | -0.46     | 8.81     | 0.14 | 0.74 | IV   |
| m1...m11 | π...H4-C4                  | -2.15    | -1.95     | 12.59    | 0.58 | 1.06 | III  |
| m1...m12 | N1-H1B...O1                | -10.14   | -9.72     | 15.03    | 2.88 | 1.27 | II   |
| m1...m13 | π...π                      | -4.91    | -4.39     | 24.33    | 1.30 | 2.06 | II   |
| m1...m14 | C6-H6...F1                 | -1.89    | -1.66     | 16.19    | 0.49 | 1.37 | IV   |
| m1...m15 | Others                     | -0.65    | -0.46     | 8.81     | 0.14 | 0.74 | IV   |

**Table S10.** Energy and contact surface of the interactions on compound 9 supramolecular cluster.

| Dimer    | Interaction                     | GM1...Mn | GcM1...Mn | CM1...Mn | NG   | NC   | Type |
|----------|---------------------------------|----------|-----------|----------|------|------|------|
| m1...m2  | O1...H1A-N1<br>N1-H1A...O1      | -8,96    | -9,23     | 13,47    | 2,42 | 0,93 | I    |
| m1...m3  | N1...H3-C3<br>C3-H3...N1        | -0,86    | -1,10     | 12,90    | 0,29 | 0,89 | IV   |
| m1...m4  | C4-H4...O1                      | -3,32    | -3,73     | 14,52    | 0,98 | 1,00 | III  |
| m1...m5  | Br1...Br1                       | -1,44    | -1,32     | 8,83     | 0,35 | 0,61 | III  |
| m1...m6  | C6-H6...Br1                     | -1,10    | -1,23     | 9,67     | 0,32 | 0,67 | III  |
| m1...m7  | O1...H4-C4                      | -3,23    | -3,73     | 14,52    | 0,98 | 1,00 | III  |
| m1...m8  | O1...H1B-N1<br>N1-H1B...O1      | -6,62    | -6,85     | 12,02    | 1,80 | 0,83 | I    |
| m1...m9  | Others                          | -2,72    | -2,82     | 22,17    | 0,74 | 1,53 | IV   |
| m1...m10 | Br1...H6-C6                     | -1,11    | -1,23     | 9,67     | 0,32 | 0,67 | III  |
| m1...m11 | O1...H1B-N1<br>$\pi \cdots \pi$ | -9,03    | -9,33     | 25,51    | 2,45 | 1,76 | II   |
| m1...m12 | N1-H1A...H1B-N1                 | 1,03     | 0,65      | 2,56     | 0,17 | 0,18 | III  |
| m1...m13 | N1-H1B...O1<br>$\pi \cdots \pi$ | -9,11    | -9,32     | 25,51    | 2,44 | 1,76 | II   |
| m1...m14 | Br1...Br1                       | -1,44    | -1,32     | 8,83     | 0,35 | 0,61 | III  |
| m1...m15 | Others                          | -2,73    | -2,82     | 22,17    | 0,74 | 1,53 | IV   |

**Table S11.** Energy and contact surface of the interactions on compound 11 supramolecular cluster.

| Dimer    | Interaction                     | GM1...Mn | GcM1...Mn | CM1...Mn | NG   | NC   | Type |
|----------|---------------------------------|----------|-----------|----------|------|------|------|
| m1...m2  | O1...H1A-N1<br>N1-H1A...O1      | -13.19   | -12.83    | 14.39    | 3.57 | 1.07 | II   |
| m1...m3  | C3-H3...H1B-N1                  | -0.45    | -0.23     | 15.96    | 0.06 | 1.19 | IV   |
| m1...m4  | C4-H4...O1                      | -4.04    | -3.92     | 17.00    | 1.09 | 1.26 | II   |
| m1...m5  | I1...I1                         | -1.85    | -1.81     | 7.10     | 0.50 | 0.53 | III  |
| m1...m6  | I1...H6-C6                      | -1.34    | -1.33     | 9.56     | 0.37 | 0.71 | III  |
| m1...m7  | O1...H4-C4                      | -4.04    | -3.92     | 17.00    | 1.09 | 1.26 | II   |
| m1...m8  | N1-H1B...O1<br>O1...H1B-N1      | -7.42    | -7.06     | 13.67    | 1.97 | 1.02 | II   |
| m1...m9  | Others                          | -3.86    | -3.56     | 23.18    | 0.99 | 1.72 | IV   |
| m1...m10 | O1...H1B-N1<br>$\pi \cdots \pi$ | -8.99    | -8.62     | 27.76    | 2.40 | 2.06 | II   |
| m1...m11 | N1-H1A...H1B-N1                 | -0.42    | -0.32     | 2.75     | 0.09 | 0.20 | III  |
| m1...m12 | N1-H1B...O1<br>$\pi \cdots \pi$ | -8.99    | -8.62     | 27.76    | 2.40 | 2.06 | II   |
| m1...m13 | I1...I1                         | -1.85    | -1.81     | 7.10     | 0.50 | 0.53 | III  |
| m1...m14 | C6-H6...I1                      | -1.34    | -1.33     | 9.56     | 0.37 | 0.71 | III  |
| m1...m15 | Others                          | -3.86    | -3.56     | 23.18    | 0.99 | 1.72 | IV   |

**Table S12.** Energy and contact surface of the interactions on compound 12 supramolecular cluster.



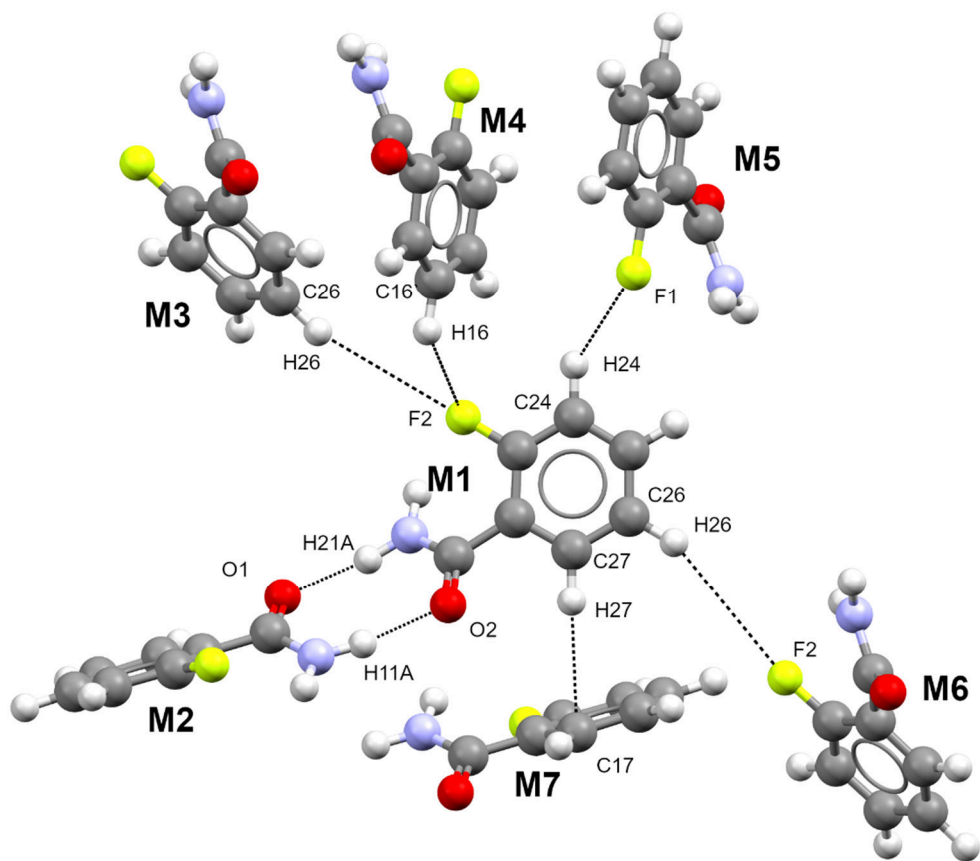

Figure S1. Central molecule with neighboring molecules in the same plane for compound 1A.

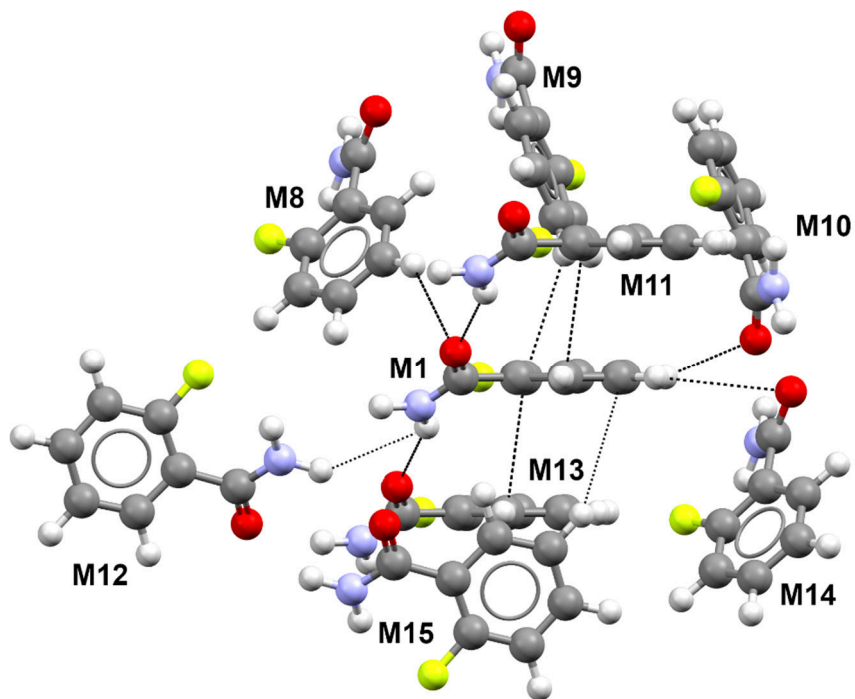

Figure S2. Central Molecule with neighboring molecules in upper and lower planes for compound 1A.

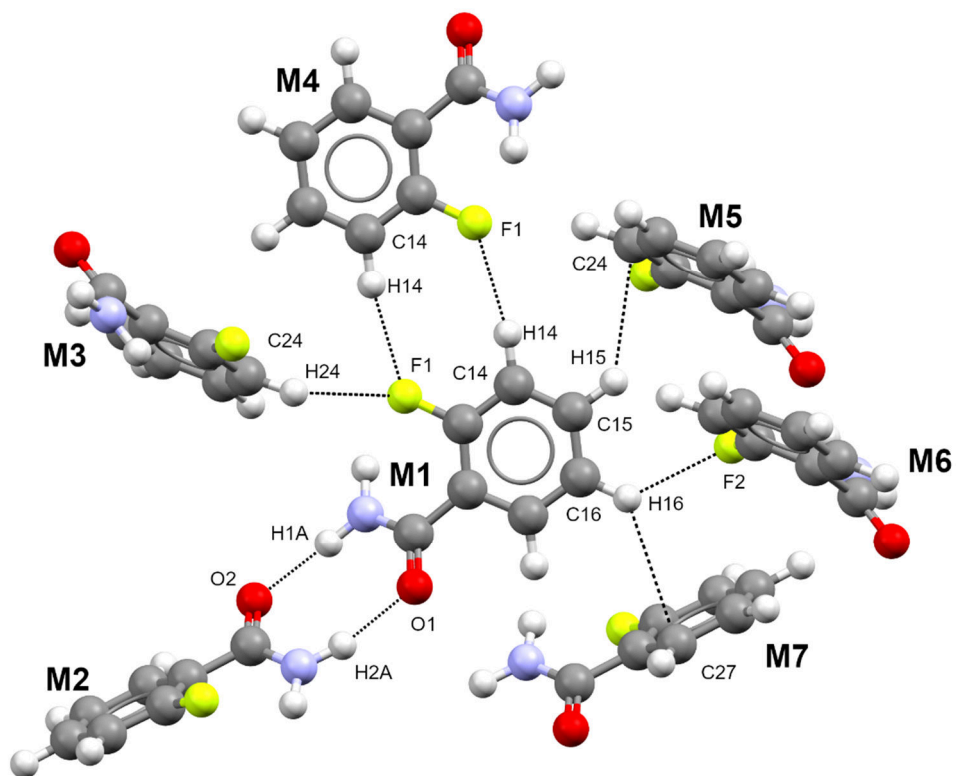

Figure S3. Central molecule with neighboring molecules in the same plane for compound 1B.

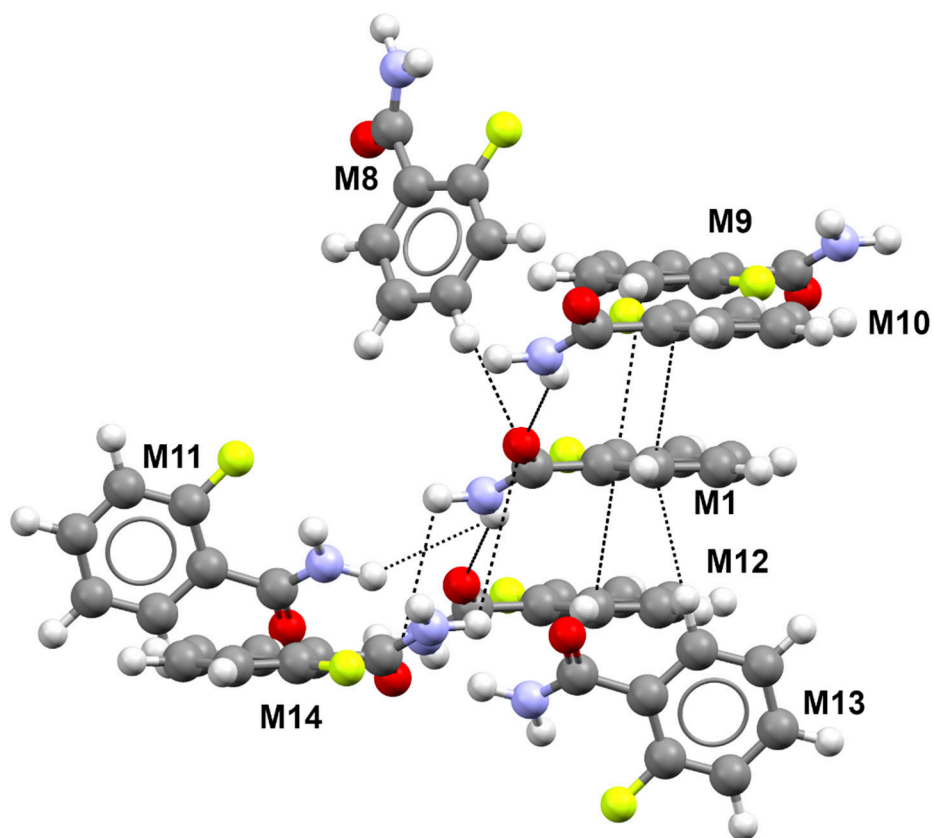

Figure S4. Central molecule with neighboring molecules in upper and lower planes for compound 1B.

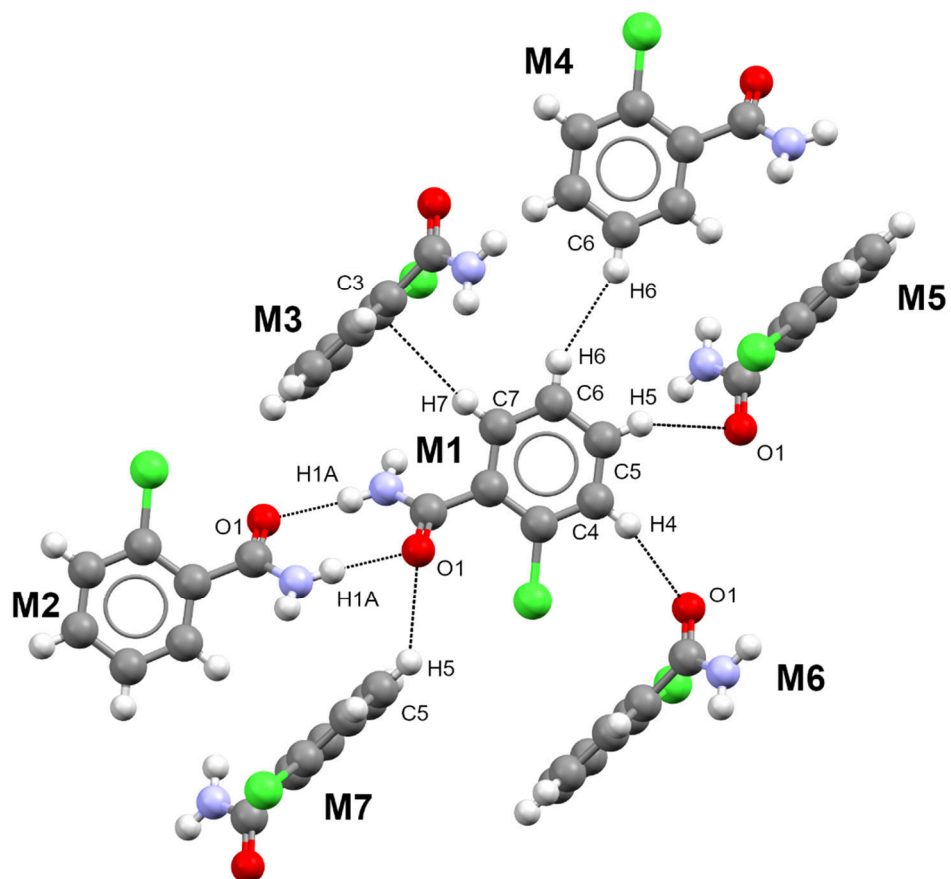

Figure S5. Central molecule with neighboring molecules in the same plane for compound 2.

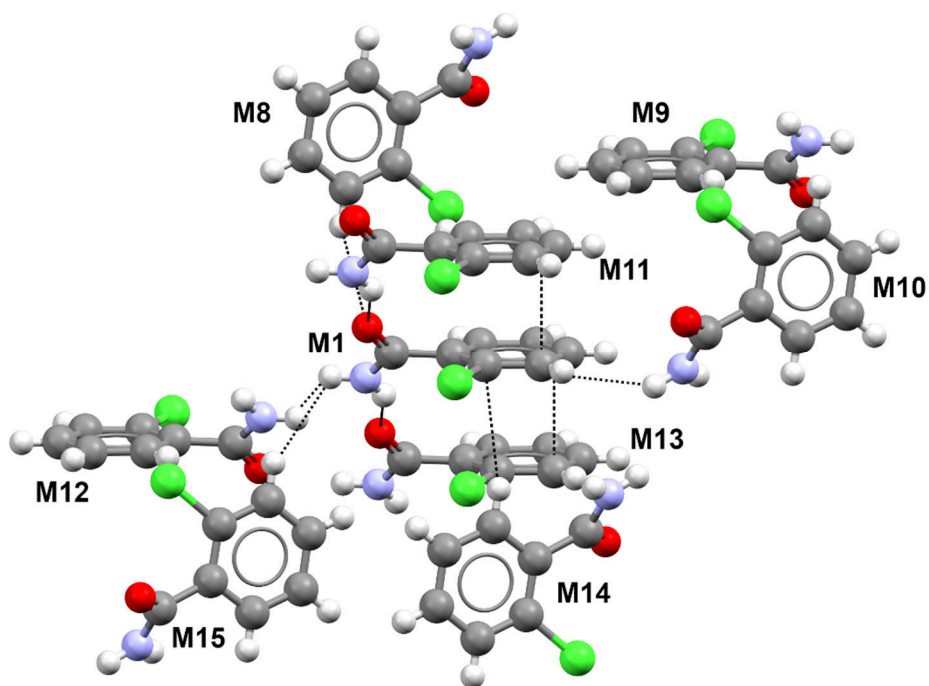

Figure S6. Central Molecule with neighboring molecules in upper and lower planes for compound 2.

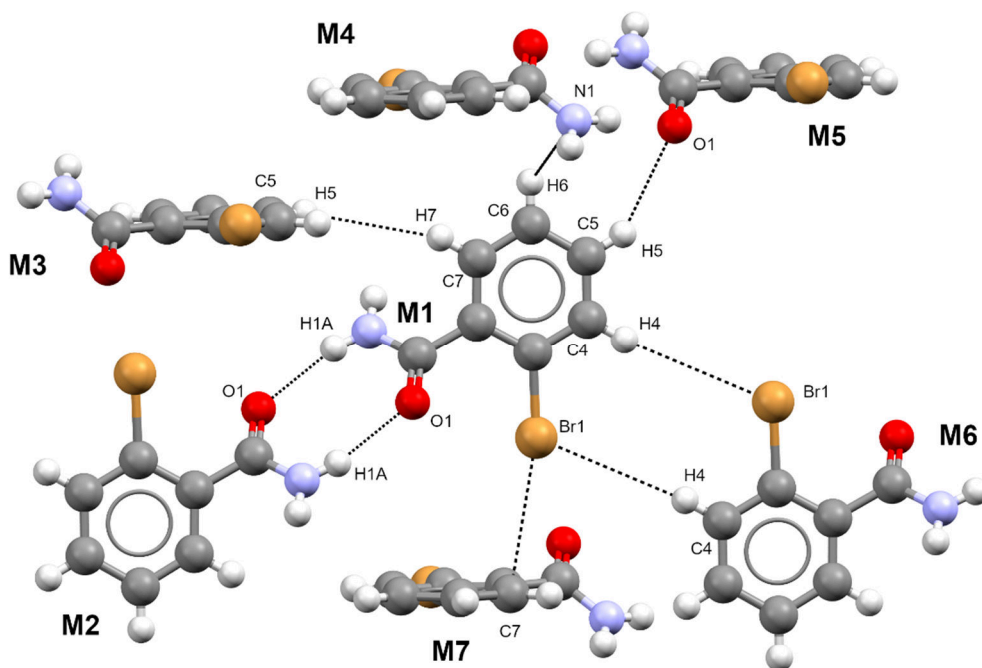

Figure S7. Central molecule with neighboring molecules in the same plane for compound 3.

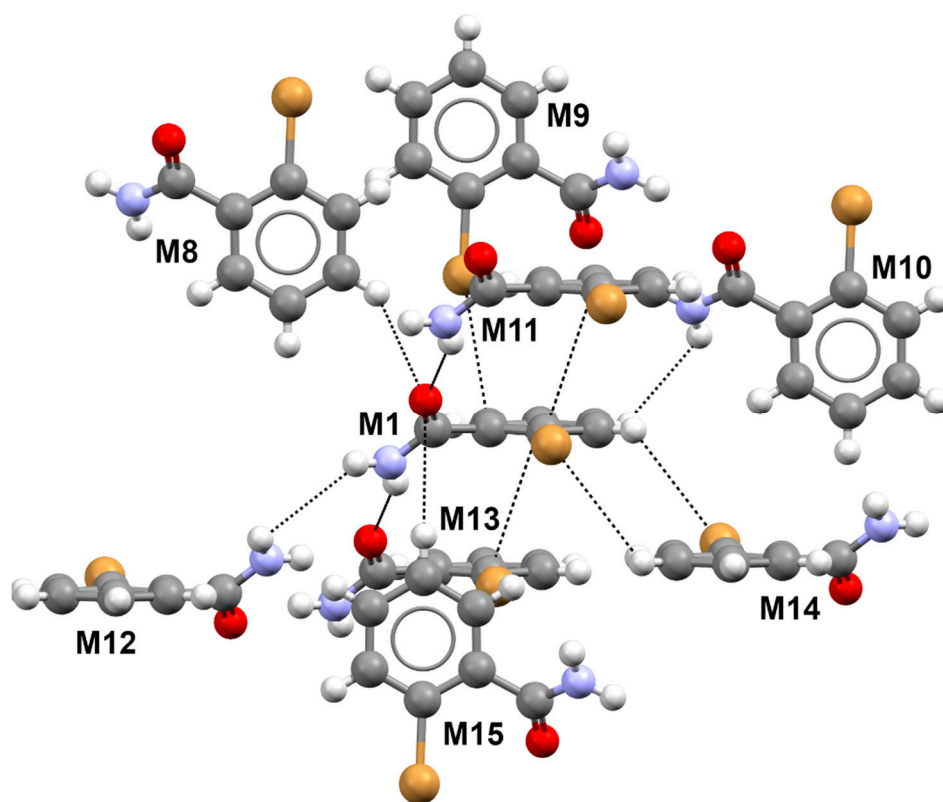

Figure S8. Central Molecule with neighboring molecules in upper and lower planes for compound 3.

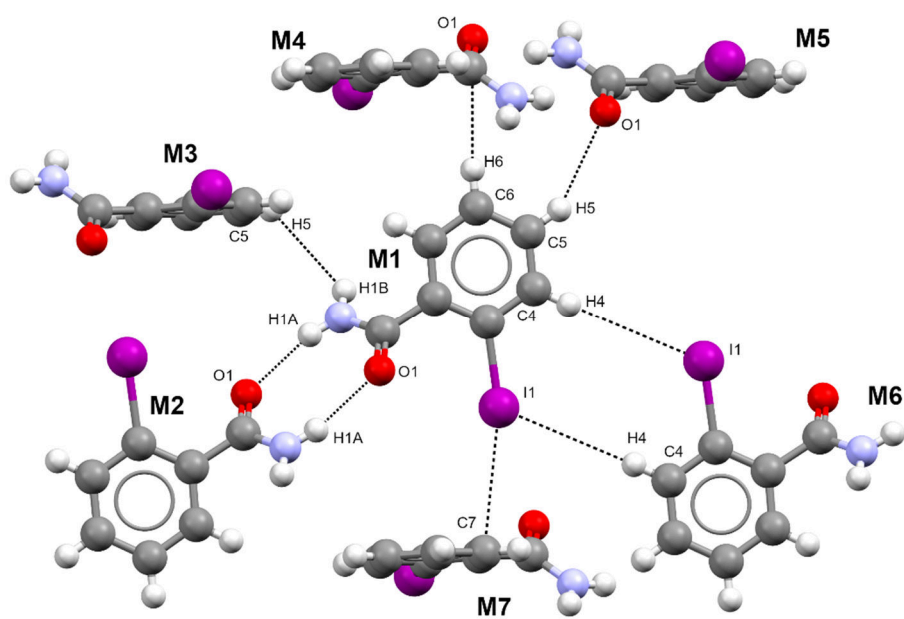

Figure S9. Central molecule with neighboring molecules in the same plane for compound 4.

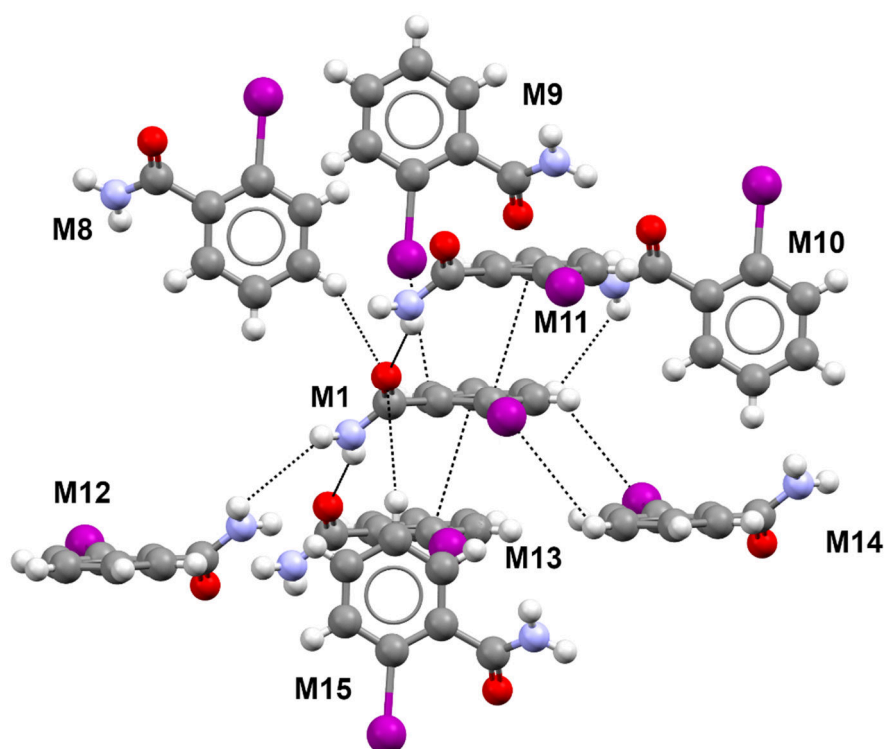

Figure S10. Central Molecule with neighboring molecules in upper and lower planes for compound 4.

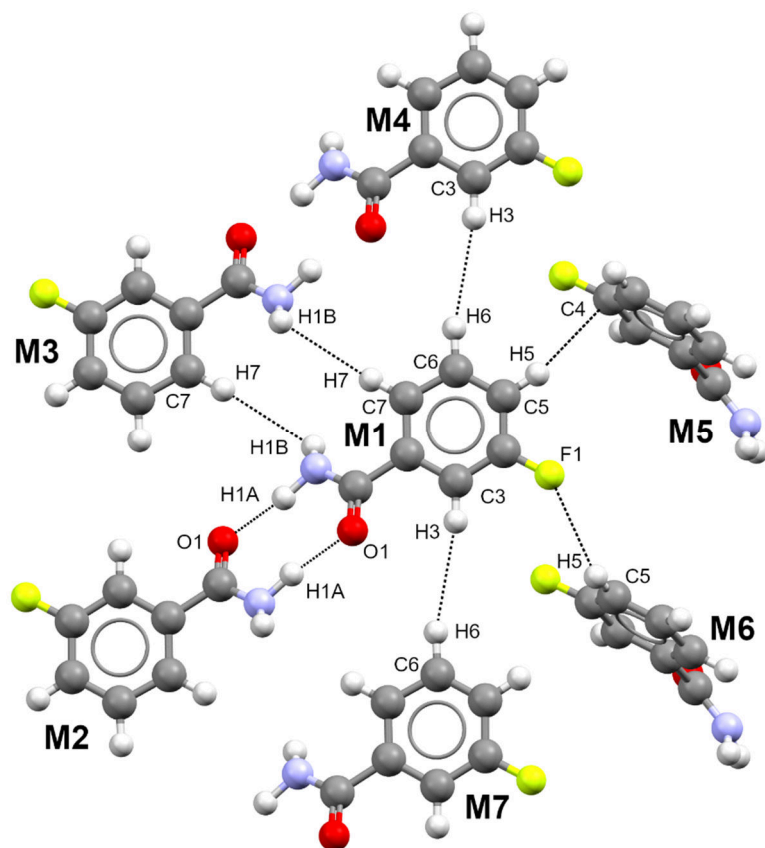

Figure S11. Central molecule with neighboring molecules in the same plane for compound 5.

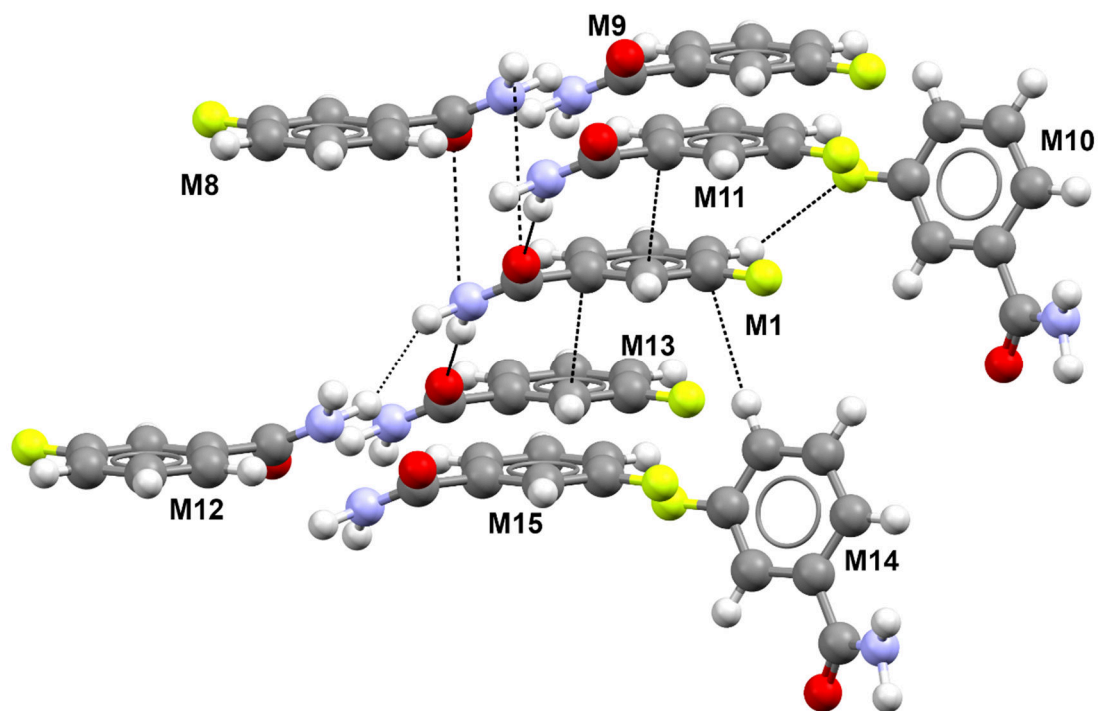

Figure S12. Central Molecule with neighboring molecules in upper and lower planes for compound 5.

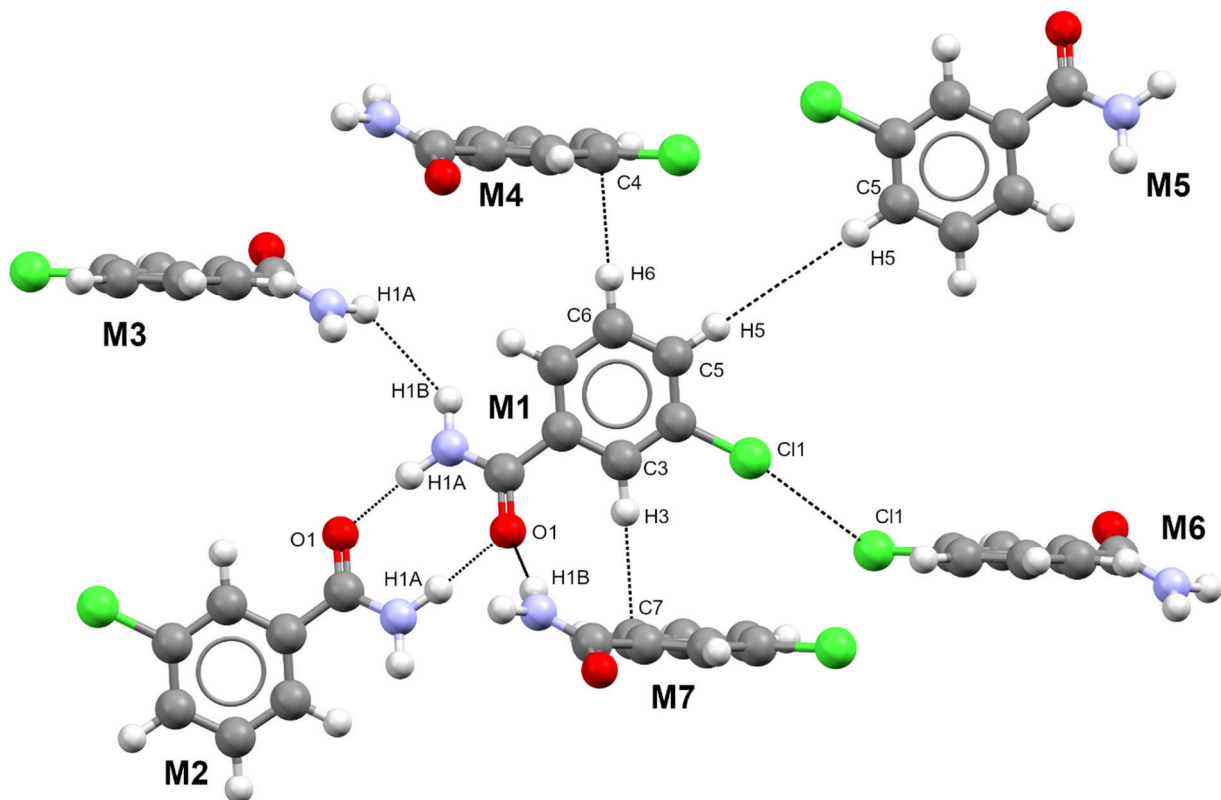

Figure S13. Central molecule with neighboring molecules in the same plane for compound 6.

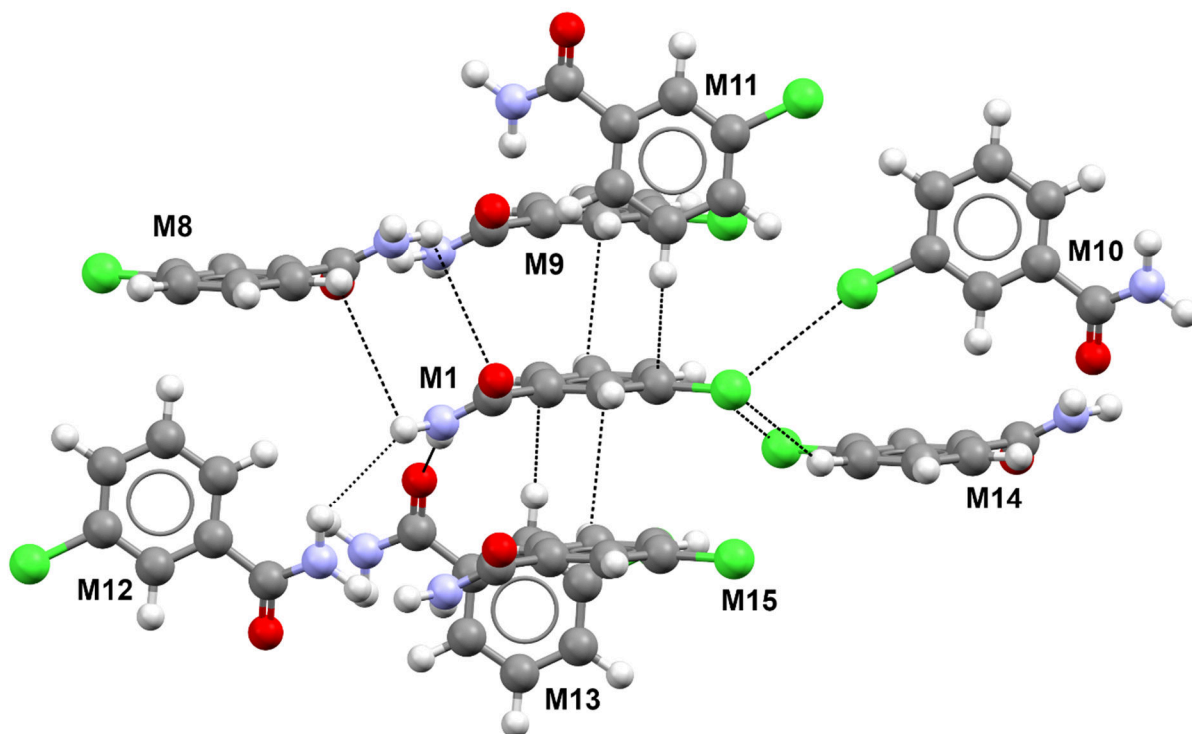

Figure S14. Central Molecule with neighboring molecules in upper and lower planes for compound 6.

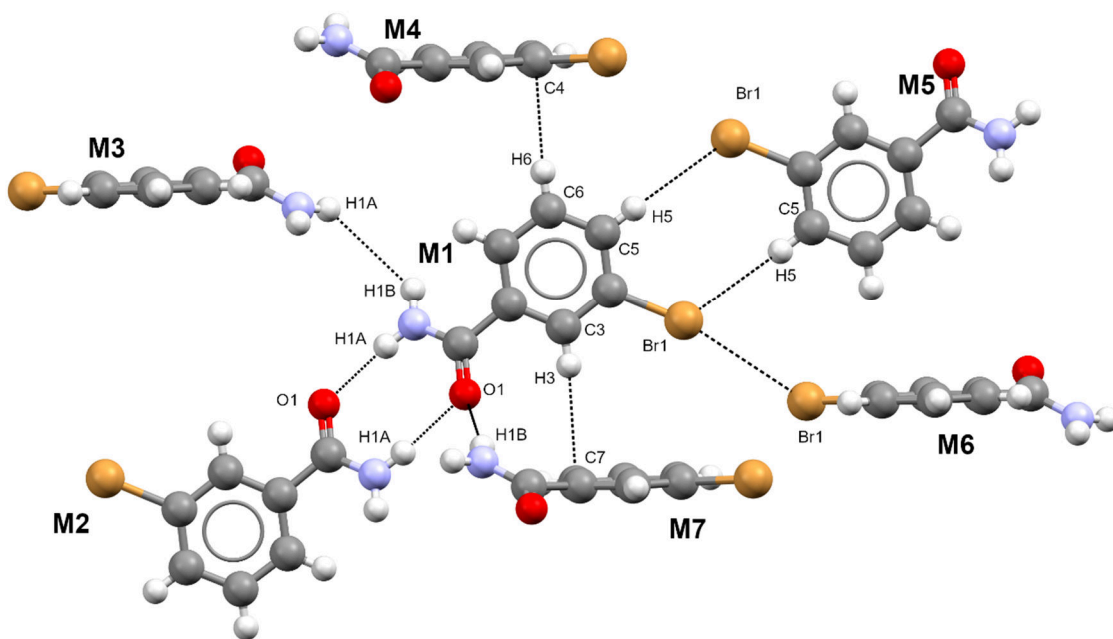

Figure S15. Central molecule with neighboring molecules in the same plane for compound 7.

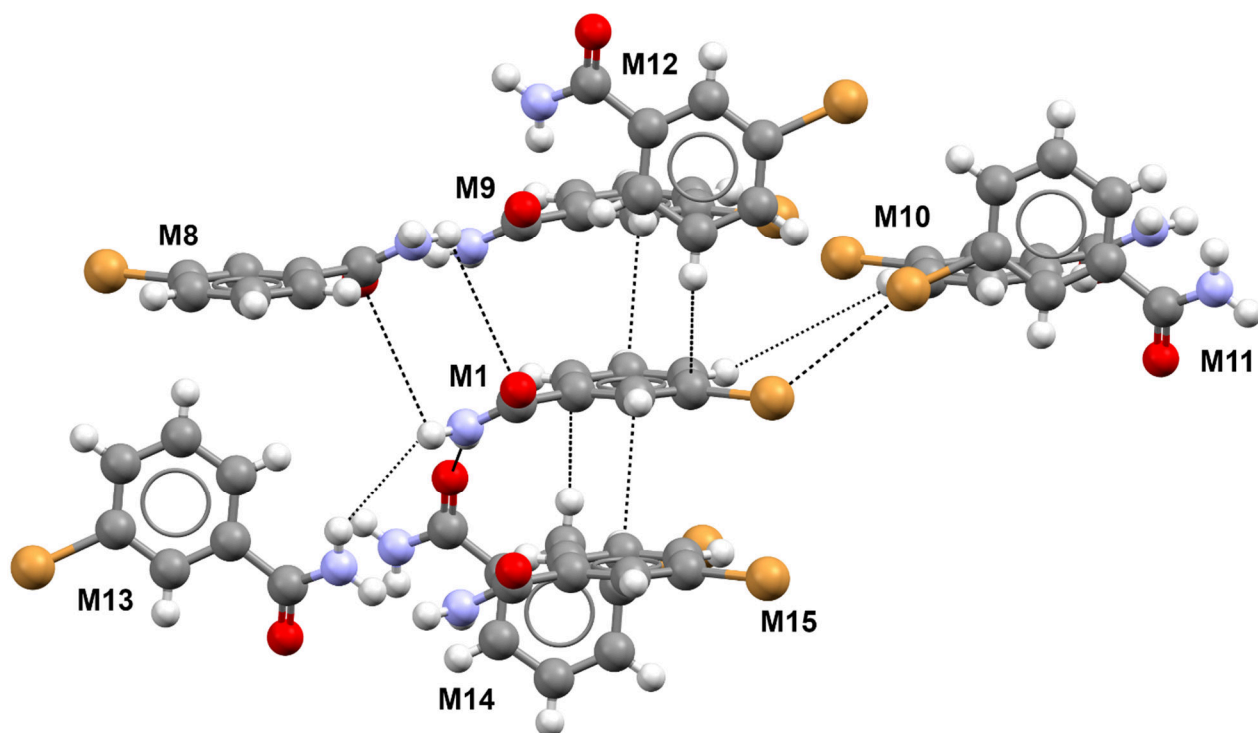

Figure S16. Central Molecule with neighboring molecules in upper and lower planes for compound 7.



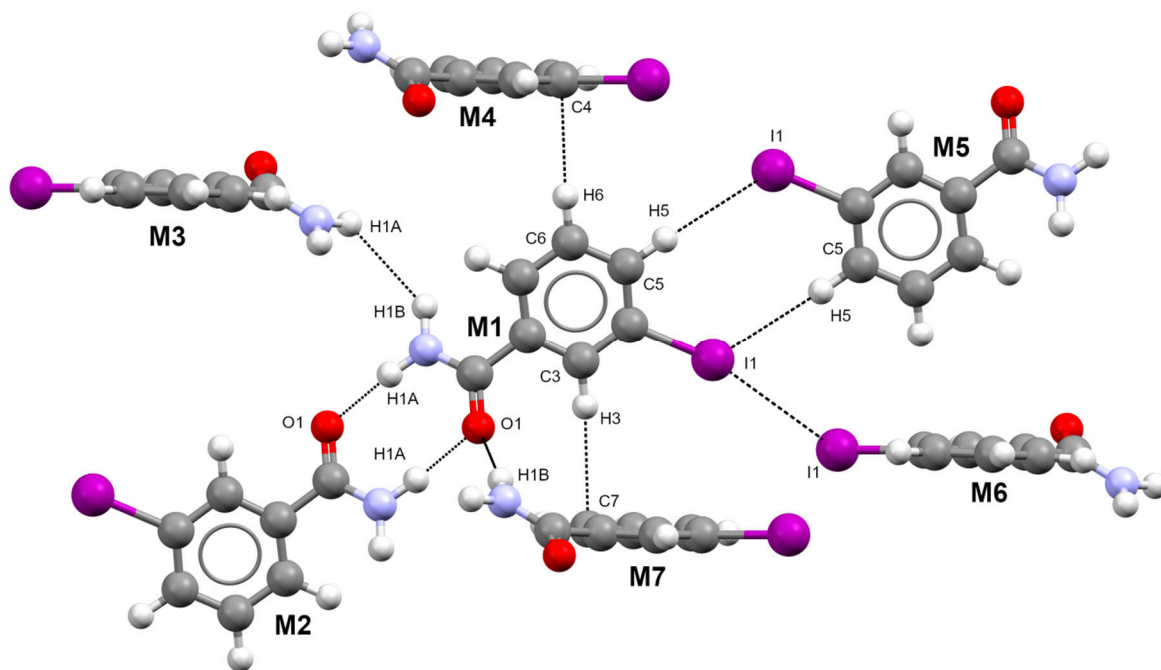

Figure S17. Central molecule with neighboring molecules in the same plane for compound 8.

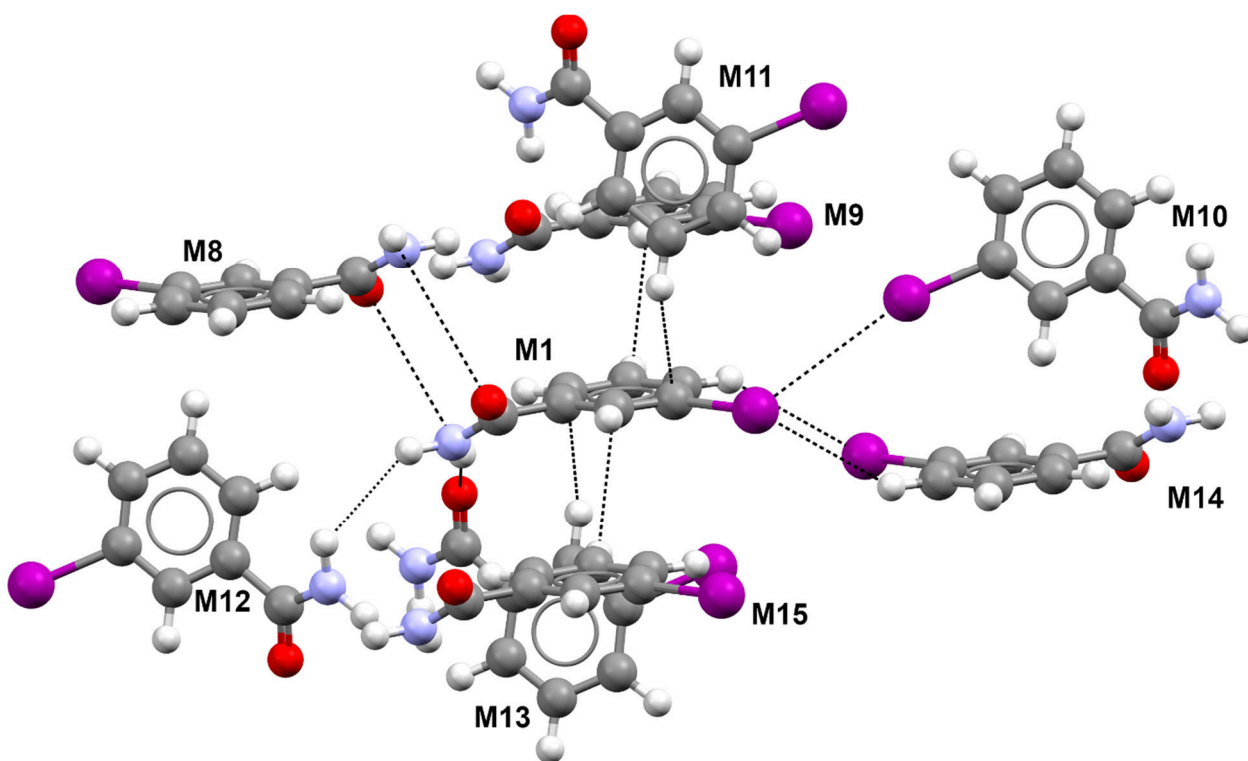

Figure S18. Central Molecule with neighboring molecules in upper and lower planes for compound 8.

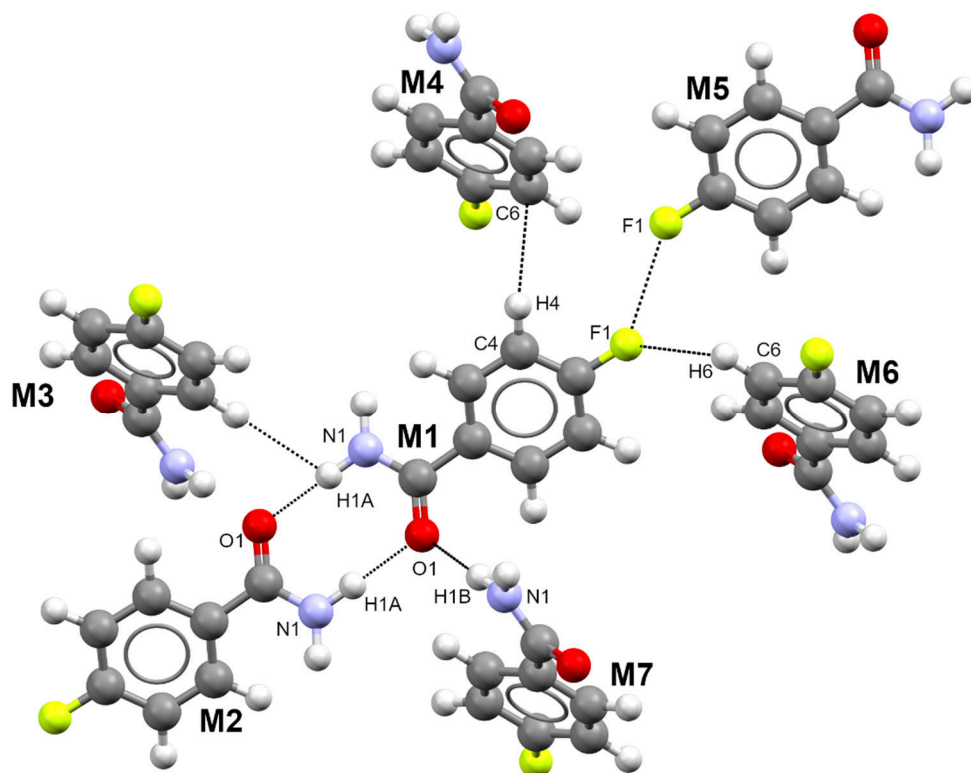

Figure S19. Central molecule with neighboring molecules in the same plane for compound 9.

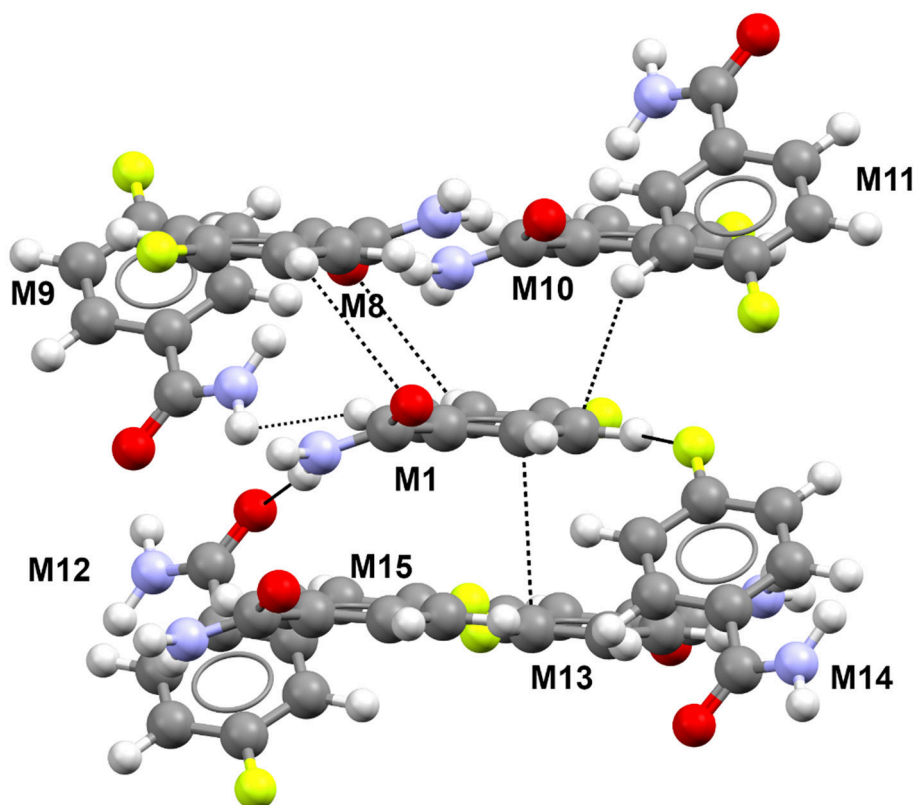

Figure S20. Central Molecule with neighboring molecules in upper and lower planes for compound 9.

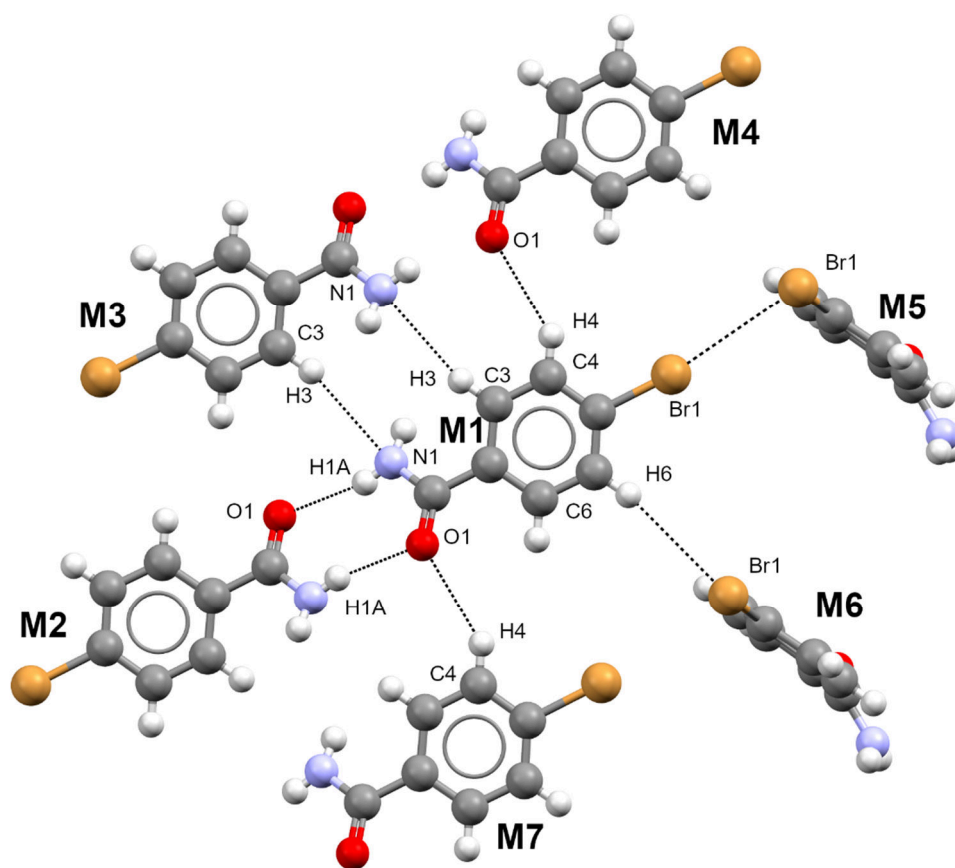

Figure S21. Central molecule with neighboring molecules in the same plane for compound 11.

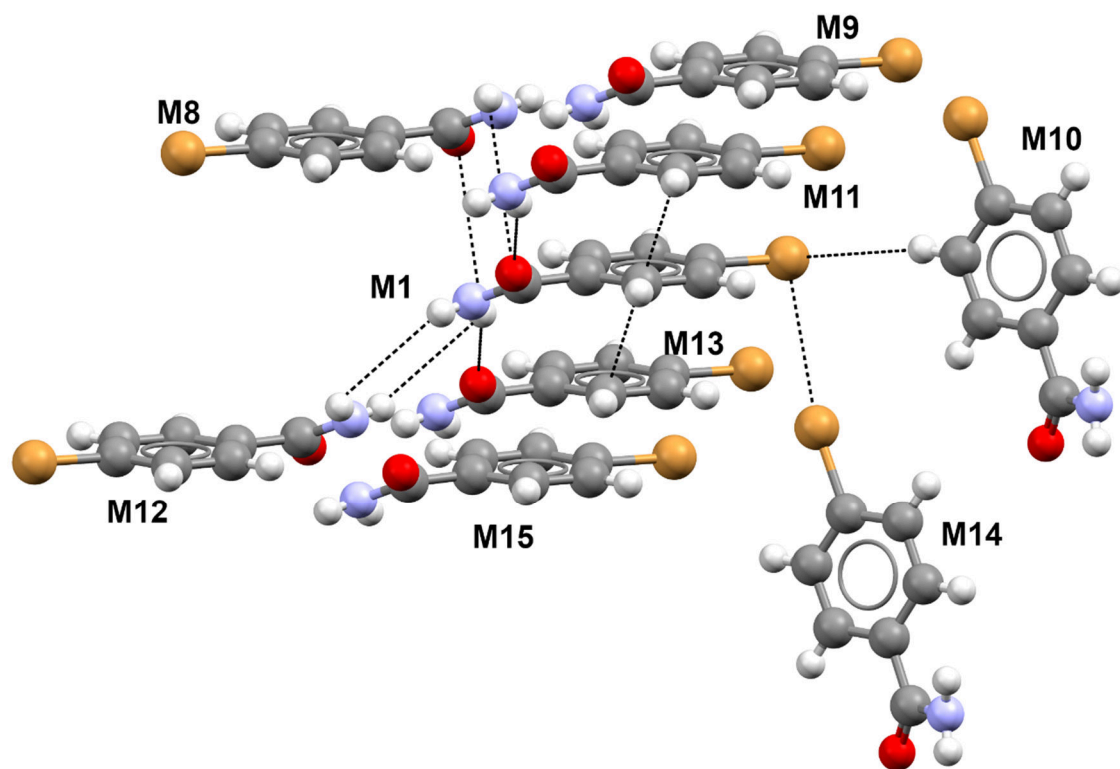

Figure S22. Central molecule with neighboring molecules in upper and lower planes for compound 11.

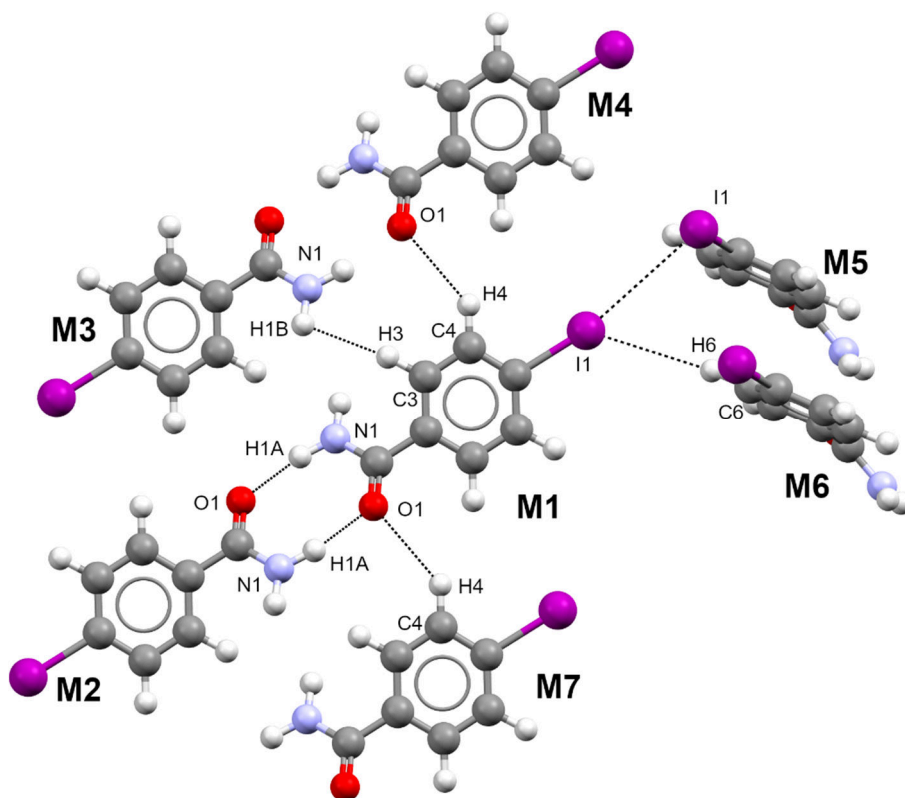

Figure S23. Central molecule with neighboring molecules in the same plane for compound 12

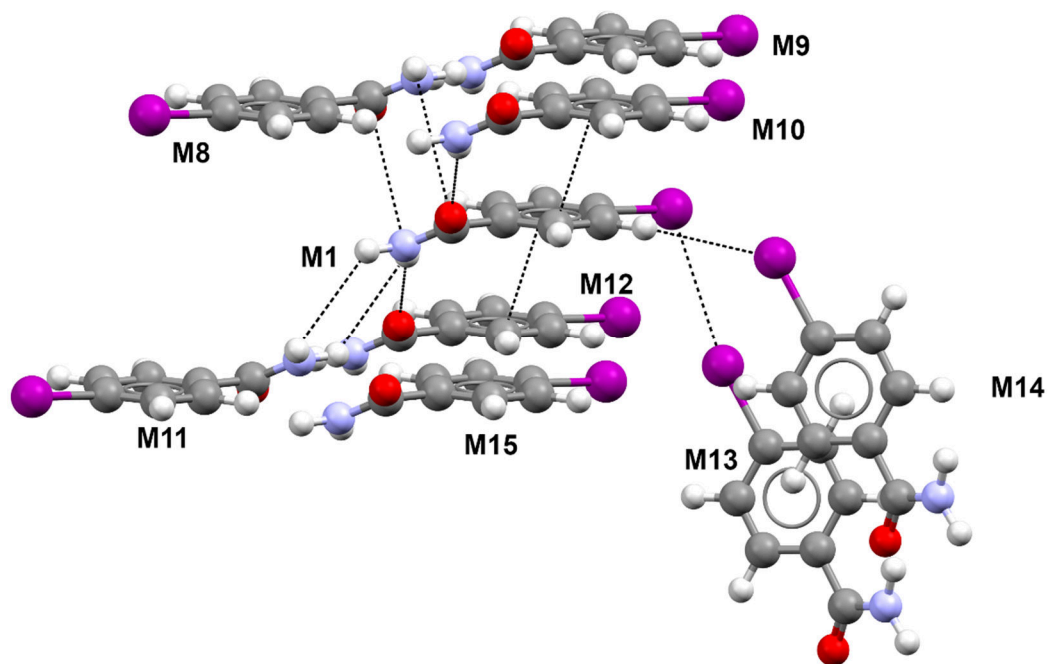

Figure S24. Central Molecule with neighboring molecules in upper and lower planes for compound 12

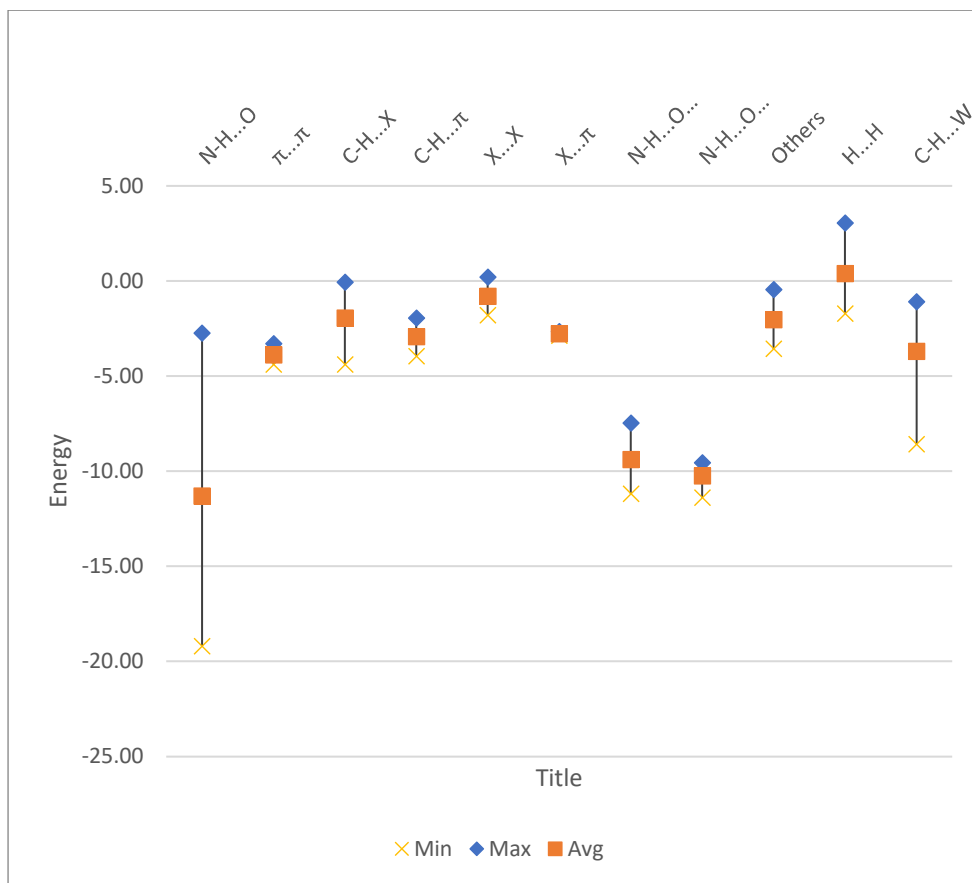

Figure S25 - energy range by interaction Class

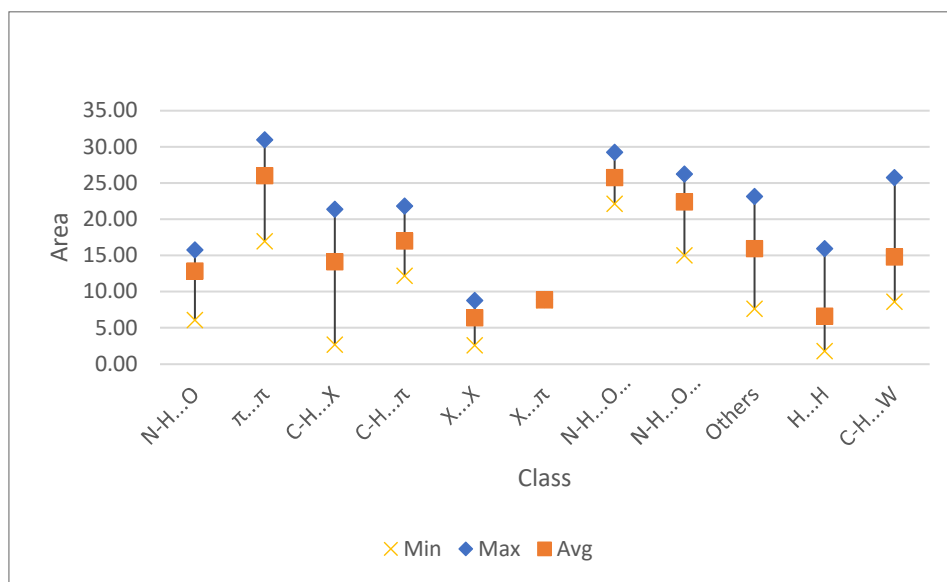

Figure S26 - Area range by interaction class

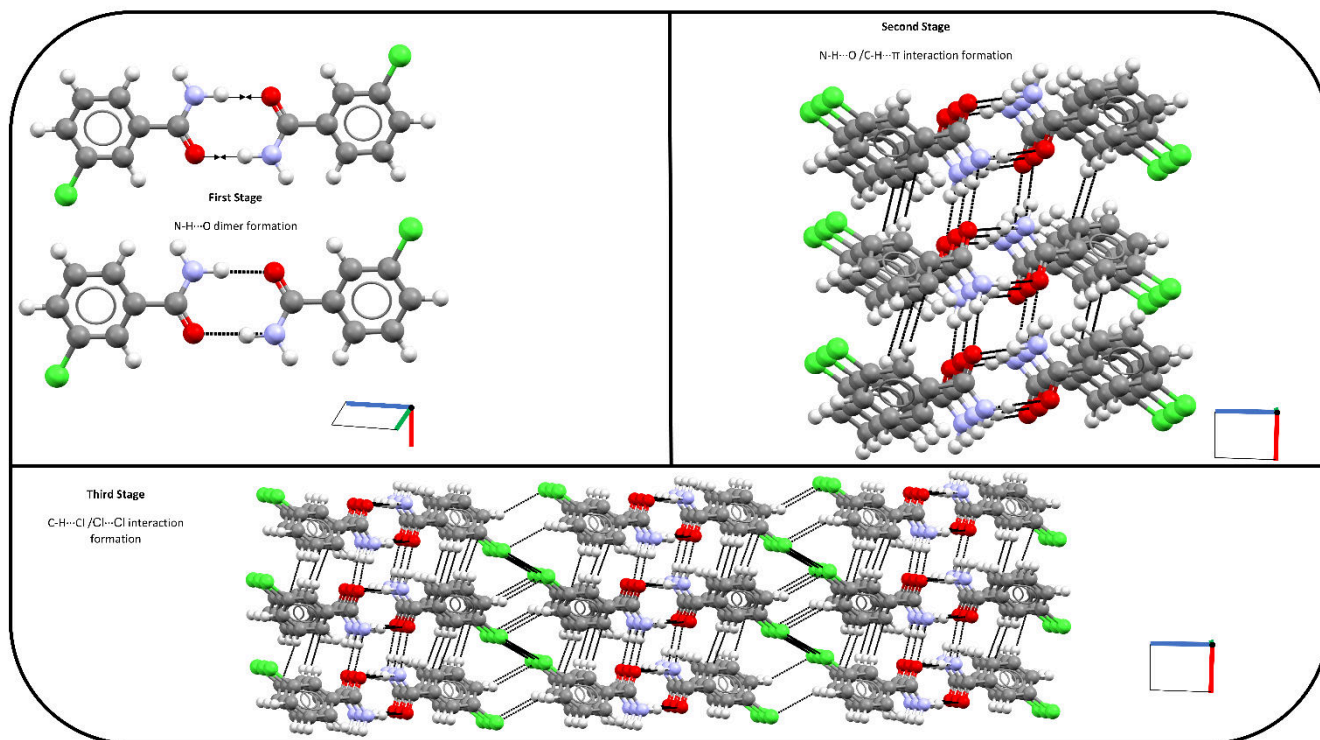

Figure S27 - Nucleation proposal for compound 6.

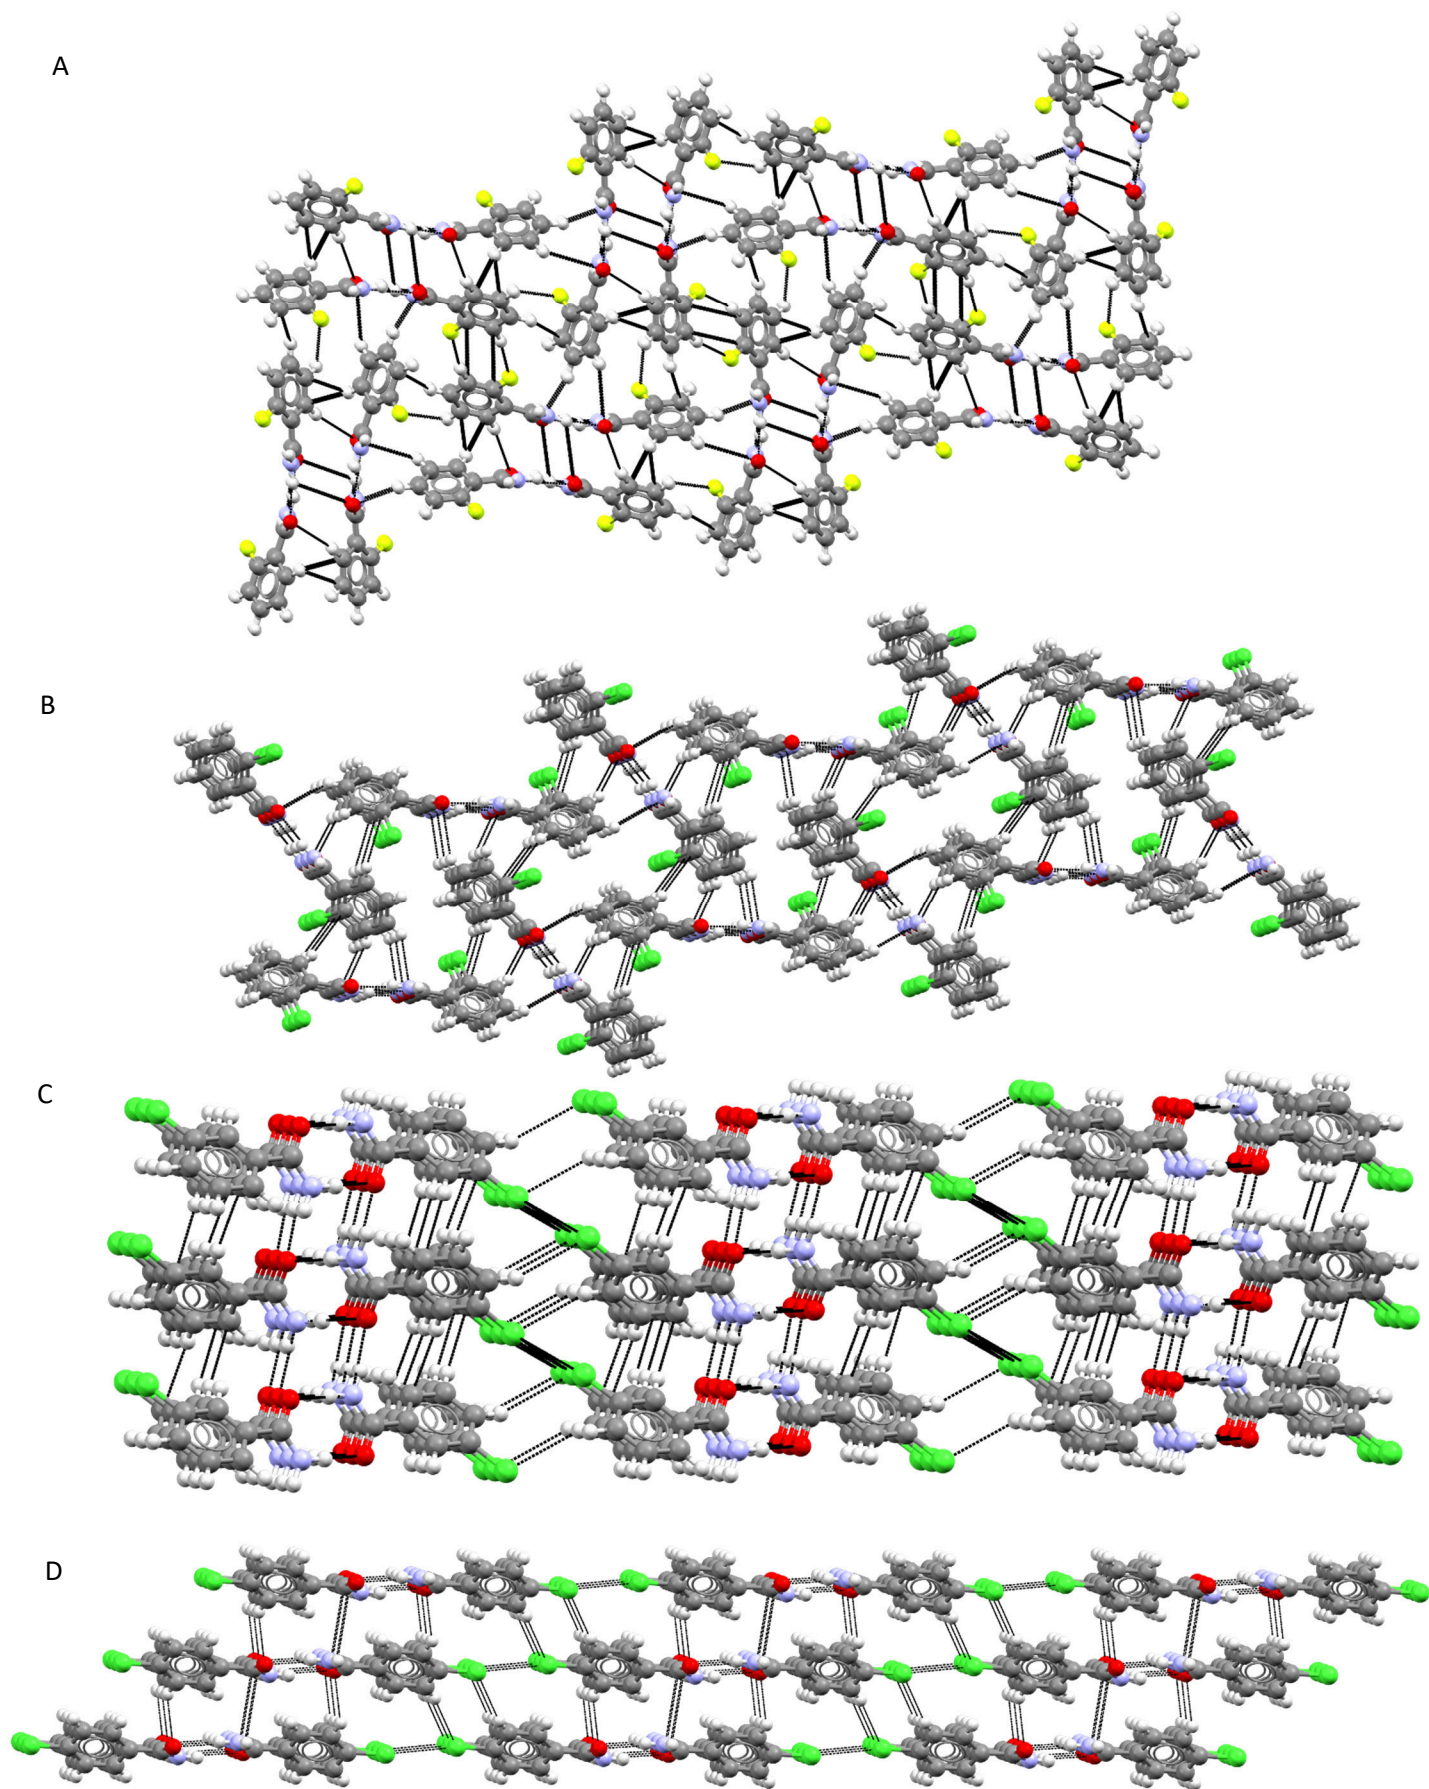

Supplement: d2ce00049k2.pdf [file d2ce00049k2.pdf]
